# Supplementary material for: Unsupervised automated high throughput phenotyping of RNAi time-lapse movies
Source: Springer Nature journal article supplement (doi:10.1186/1471-2105-14-292), 2013-10-04

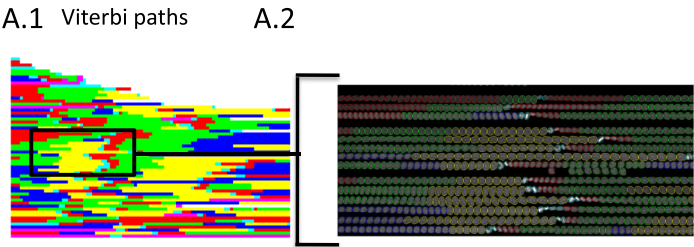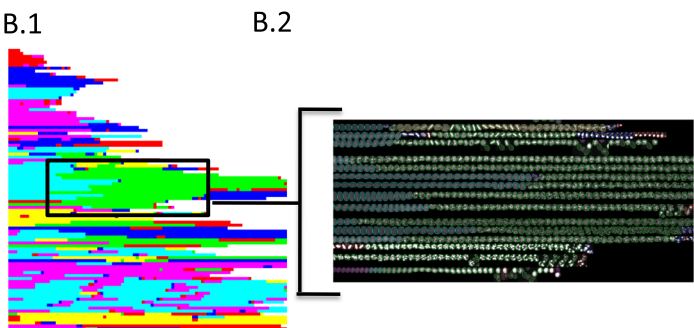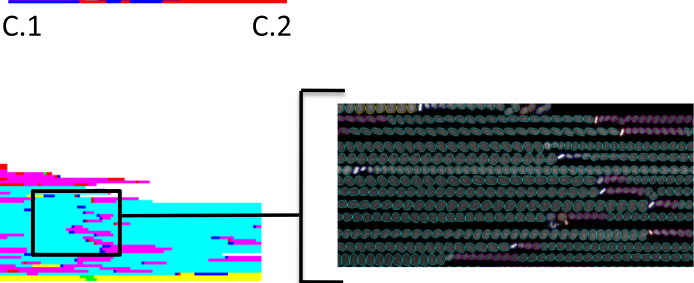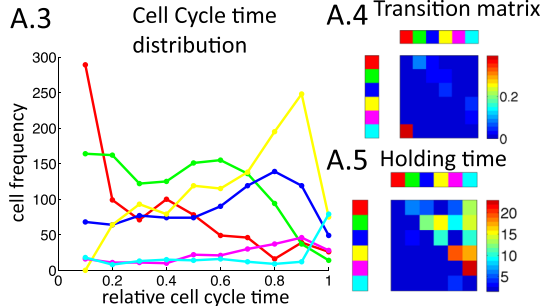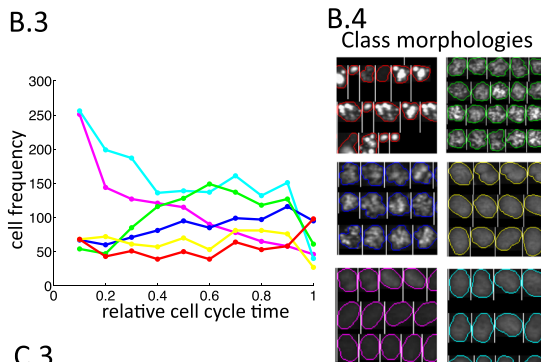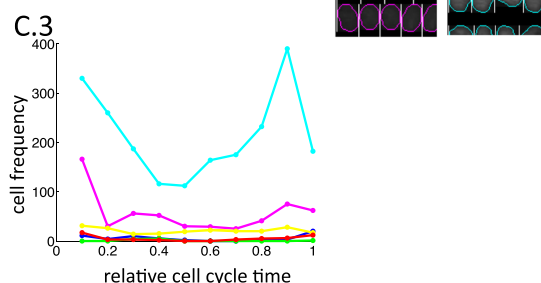

Supplement: 12859_2013_6076_MOESM4_ESM.pdf [file 12859_2013_6076_MOESM4_ESM.pdf]
